# Supplementary material for: Reduced graphene oxide anchored Cu(OH)2as a high performance electrochemical supercapacitor
Source: Royal Society of Chemistry journal article supplement (doi:10.1039/c5dt01643f), 2015-01-01
Supplement: c5dt01643f1.pdf [file c5dt01643f1.pdf]

**Electronic Supplementary Information (ESI) for**

**Reduced graphene oxide anchored Cu(OH)<sub>2</sub> as high performance electrochemical supercapacitor**

Atin Pramanik, Sandipan Maiti and Sourindra Mahanty\*

Fuel Cell & Battery Division

CSIR-Central Glass & Ceramic Research Institute

Kolkata 700032 India

and CSIR-Network Institutes for Solar Energy (NISE), India

---

\*Correspondence to be addressed to: mahanty@cgcri.res.in; s\_mahanty@hotmail.com

Tel: +91-33-2322 3495 Fax: +91-33-2473 0957

## Supporting Information

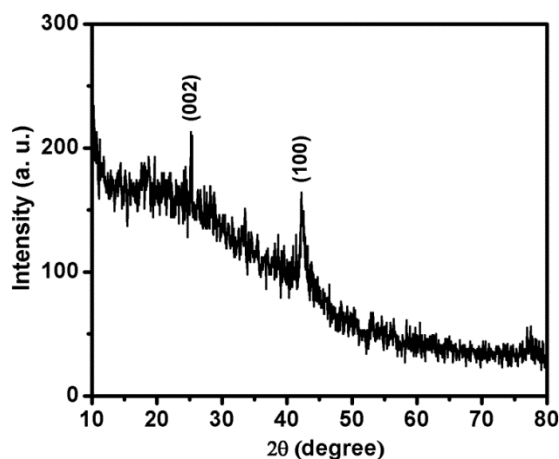

Fig.S1 X-ray diffractogram of the synthesized graphene oxide (GO). Two prominent peaks, observed at 25.2° and 42.1°, can be indexed to the characteristic reflections of from (002) and (100) planes respectively of rhombohedral GO (space group R-3m).<sup>1,2</sup> This is in agreement with JCPDS data (File number 01-074-2329).

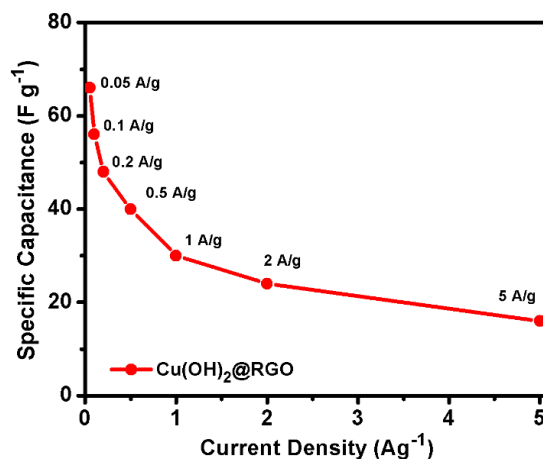

Fig.S2 Variation of specific capacitance ( $C_s$ ) of  $\text{Cu}(\text{OH})_2@\text{RGO}$  symmetric cell with increasing current density (0.05 A g<sup>-1</sup> to 5 A g<sup>-1</sup>). At a current density of 0.05 A g<sup>-1</sup>, a  $C_s$  value of 66 F g<sup>-1</sup> is observed. However, as the current density is increased,  $C_s$  is found to decrease gradually. Nonetheless, even at a high current density of 5 A g<sup>-1</sup>,  $\text{Cu}(\text{OH})_2@\text{RGO}$  shows a  $C_s$  of 16 F g<sup>-1</sup>.

## References

- 1 Y. Wang, Y. M. Li, L. H. Tang, J. Lu, J. H. Li, *Electrochem. Commun.*, 2009, **11**, 889.
- 2 G. Wang, J. Yang, J. Park, X. Gou, B. Wang, H. Liu, J. Yao, *J. Phys. Chem. C*, 2008, **112**, 8192.
